# Supplementary material
Source: PubMed Central journal article supplement (PMC7005909)
Supplement: NIHMS1544100-supplement-2.pdf [file NIHMS1544100-supplement-2.pdf]

Supplementary Table 1. Clinical characteristics of patients.

| Group      | Pt # | Age Sex | Underlying Disease                 | HCT-CI | Disease Risk* | Conditioning Regimen | Conditioning Intensity | HCT Source                   | HCT manipulation |
|------------|------|---------|------------------------------------|--------|---------------|----------------------|------------------------|------------------------------|------------------|
| Fungal BSI | 1    | 54 F    | Multiple Myeloma                   | 5      | High          | bu/mel/flu           | MA                     | Unrelated Non-identical      | TCD              |
|            | 2    | 56 F    | Myelodysplastic Syndrome           | 4      | Low           | flu/cy/thio/TBI-400  | RIC                    | Double Cord                  | unmodified       |
|            | 3    | 52 F    | Angioimmunoblastic T-Cell Lymphoma | 3      | Low           | flu/mel              | RIC                    | Unrelated Identical          | unmodified       |
|            | 4    | 49 F    | Diffuse, large cell Lymphoma       | 4      | Intermediate  | flu/mel              | RIC                    | Unrelated Identical          | unmodified       |
|            | 5    | 73 F    | Acute Myelogenous Leukemia         | 7      | Low           | mel/thio/flu         | MA                     | Related Haploidentical       | unmodified       |
|            | 6    | 65 M    | Acute Myelogenous Leukemia         | 5      | Low           | flu/cy/thio/TBI-400  | RIC                    | Double Cord + Haploidentical | TCD              |
|            | 7    | 68 F    | Multiple Myeloma                   | 0      | High          | bu/mel/flu           | MA                     | Unrelated Non-identical      | TCD              |
|            | 8    | 24 F    | Aplastic Anemia                    | 1      | N/A           | flu/cy/TBI-200       | NMA                    | Unrelated Identical          | unmodified       |
| Control    | 9    | 39 M    | Acute Myelogenous Leukemia         | 0      | Intermediate  | bu/mel/flu           | MA                     | Unrelated Identical          | TCD              |
|            | 10   | 62 M    | Myelodysplastic Syndrome           | 2      | High          | bu/flu/mel           | MA                     | Related Identical Sibling    | TCD              |
|            | 11   | 72 M    | Myelodysplastic Syndrome           | 4      | High          | flu/mel              | RIC                    | Unrelated Identical          | unmodified       |
|            | 12   | 69 M    | Mantle cell Lymphoma               | 2      | Intermediate  | cy/flu/TBI-200       | NMA                    | Related Identical Sibling    | unmodified       |
|            | 13   | 68 F    | Myelodysplastic Syndrome           | 1      | N/A           | mel/thio/flu         | MA                     | Haploidentical               | unmodified       |
|            | 14   | 72 M    | Myelodysplastic Syndrome           | 0      | High          | flu/mel              | RIC                    | Unrelated Non-identical      | unmodified       |
|            | 15   | 69 M    | Chronic T-Prolymphocytic Leukemia  | 11     | Intermediate  | flu/mel              | RIC                    | Unrelated Identical          | unmodified       |

\* Disease risk based on the ASBMT Request for Information Disease Classifications schema.

HCT, hematopoietic cell transplantation; BSI, bloodstream infection; HCT-CI: HCT-specific comorbidity index; flu, fludarabine; cy, cyclophosphamide; mel, melphalan; bu, busulfan; thio, thiotepa; MA, myeloablative; RIC, reduced intensity; NMA, nonmyeloablative; TCD, T-cell depleted (ex-vivo); N/A: not available.
